# Supplementary material for: The Role of Bromodomain and Extraterminal (BET) Proteins in Controlling the Phagocytic Activity of Microglia In Vitro: Relevance to Alzheimer’s Disease
Source: MDPI journal article supplement (doi:10.3390/ijms24010013), 2022-12-20
Supplement: s1 [file s1]

## Supplementary materials

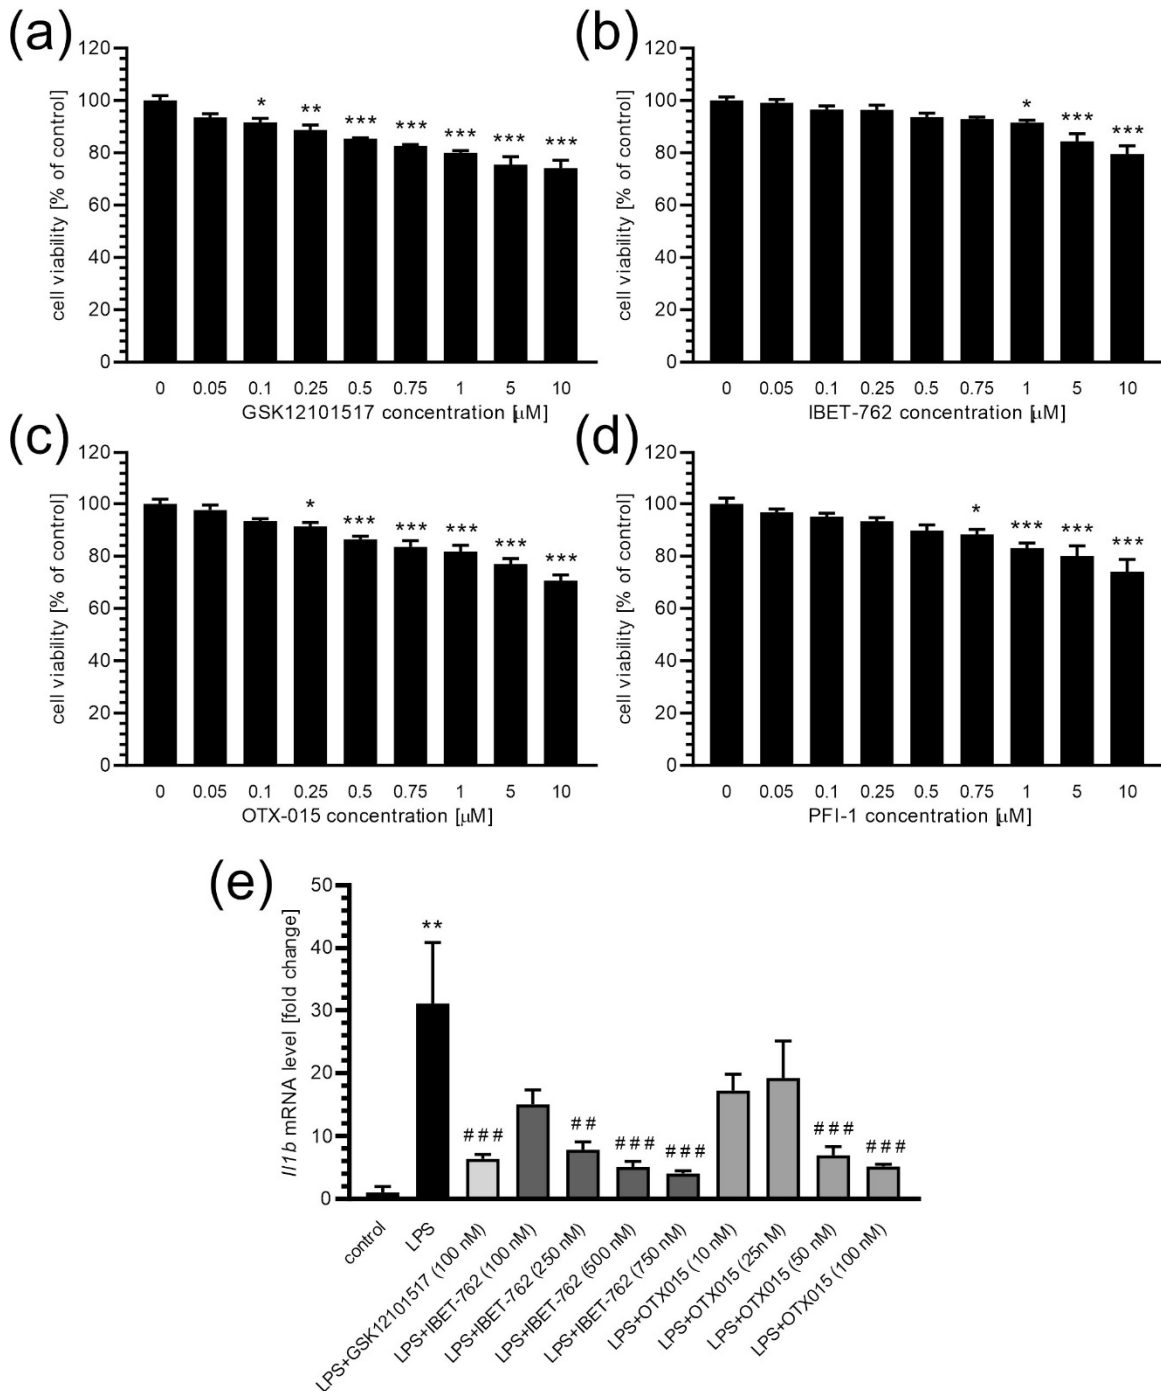

**Supplementary Figure S1.** The effect of BET inhibitors on microglial BV2 cells. (a–d) BV2 cells were incubated for 24 h in the presence of tested compounds, then MTT assay was performed to analyse cell viability (n=4). (e) BV2 cells were incubated for 2 h in the presence of LPS (100 ng/ml) and tested compound, then mRNA level for *Il1b* gene was determined by using qPCR (n=3-4). Means ± SEM were presented. \*, \*\*, \*\*\* p<0.05, 0.01, and 0.001, respectively, compared to the control. ##, ### p<0.01, and p<0.001, respectively, compared to LPS-treated group. Statistical analysis was performed by using a one-way ANOVA followed by the Bonferroni post-hoc test.

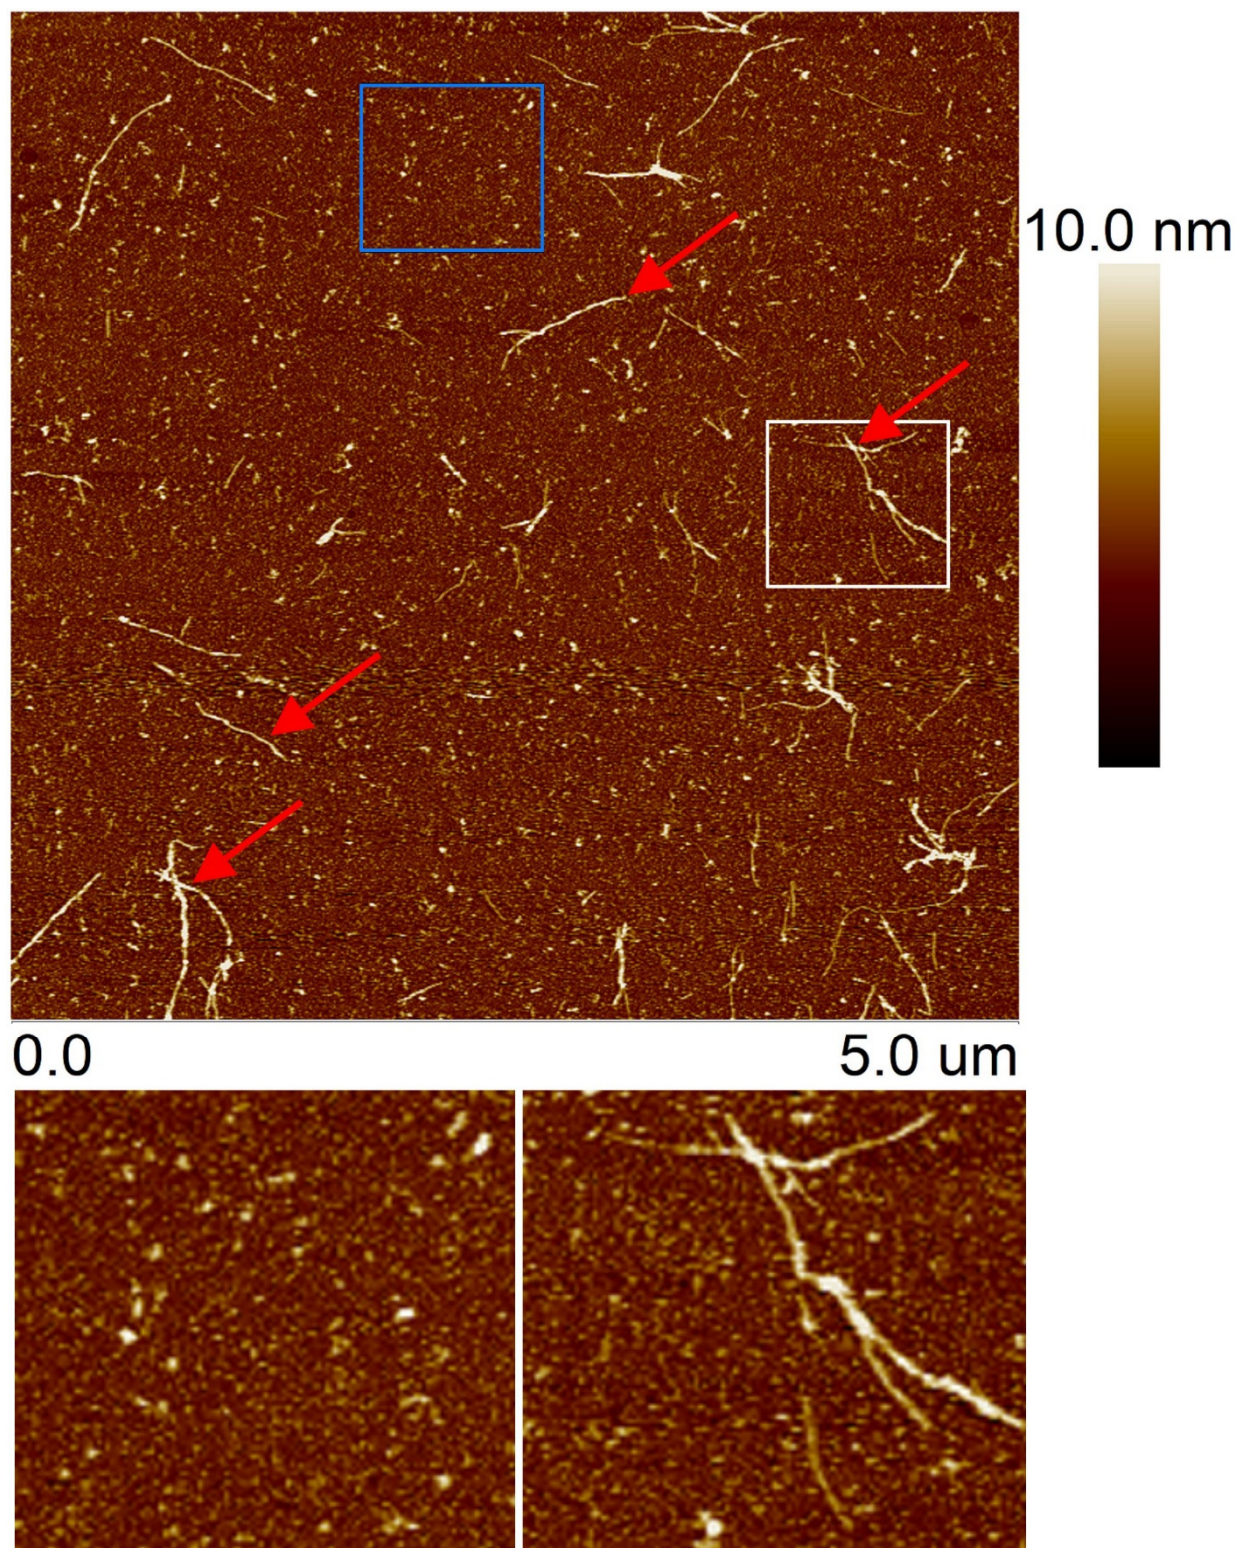

**Supplementary Figure S2.** High resolution AFM picture of A $\beta$  after 2 h incubation at 37 °C. On the upper panel example oligomers were marked with a blue rectangle, red arrows indicate representative protofibrils. Lower panel shows marked areas in higher magnification.

**Supplementary Table S1.** The results of gene expression array analysis.

TaqMan Array Mouse Phagocytosis 96-well plate, fast, RPU62UA

Normalization method Global Normalization

Fold Change Boundary 2.0

P-Value Boundary 0.05

Statistical Test T-test

N=4

\* control

|   | Assay ID      | Gene Symbol | Gene Name                                                                | Fold Change | P-Value     | Result         |
|---|---------------|-------------|--------------------------------------------------------------------------|-------------|-------------|----------------|
| * | Hs99999901_s1 | 18s rRNA    | eukaryotic 18S rRNA                                                      | 1.321       | 0.56012934  | Insignificant  |
| * | Mm00607939_s1 | Actb        | actin, beta                                                              | 0.995       | 0.9702059   | Insignificant  |
|   | Mm00456425_m1 | Adipoq      | adiponectin, C1Q and collagen domain containing                          | 1.861       | 0.31970453  | Insignificant  |
|   | Mm01134790_g1 | Ager        | advanced glycosylation end product-specific receptor                     | 1.084       | 0.8682234   | Insignificant  |
|   | Mm00440225_m1 | Anxa1       | annexin A1                                                               | 0.411       | 0.031275354 | Down-regulated |
|   | Mm00437221_m1 | Axl         | AXL receptor tyrosine kinase                                             | 0.465       | -           | N.A.           |
| * | Mm00437762_m1 | B2m         | beta-2 microglobulin                                                     | 0.728       | 0.29210293  | Insignificant  |
|   | Mm00437838_m1 | C3          | complement component 3                                                   | 1.533       | 0.5392111   | Insignificant  |
|   | Mm00482936_m1 | Calr        | calreticulin                                                             | 0.960       | 0.9062711   | Insignificant  |
|   | Mm00438094_g1 | Cd14        | CD14 antigen                                                             | 0.301       | 0.041669343 | Down-regulated |
|   | Mm01135198_m1 | Cd36        | CD36 antigen                                                             | 0.152       | 0.027002657 | Down-regulated |
|   | Mm01277163_m1 | Cd44        | CD44 antigen                                                             | 0.501       | 0.10117423  | Insignificant  |
|   | Mm00495011_m1 | Cd47        | CD47 antigen (Rh-related antigen, integrin-associated signal transducer) | 0.975       | 0.886271    | Insignificant  |
|   | Mm01257219_m1 | Ceacam3     | carcinoembryonic antigen-related cell adhesion molecule 3                | -           | -           | N.A.           |
|   | Mm01183349_m1 | Clec7a      | C-type lectin domain family 7, member a                                  | 0.172       | 0.012091957 | Down-regulated |
|   | Mm01179940_mH | Clic4       | chloride intracellular channel 4 (mitochondrial)                         | 0.823       | 0.6299917   | Insignificant  |
|   | Mm01169510_m1 | Cnn2        | calponin 2                                                               | -           | -           | N.A.           |
|   | Mm01236242_m1 | Colec12     | collectin sub-family member 12                                           | 0.827       | 0.72318345  | Insignificant  |
|   | Mm00467065_m1 | Crk         | v-crk sarcoma virus CT10 oncogene homolog (avian)                        | 1.071       | 0.8084952   | Insignificant  |
|   | Mm00432680_g1 | Crp         | C-reactive protein, pentraxin-related                                    | -           | -           | N.A.           |
|   | Mm00432686_m1 | Csf1        | colony stimulating factor 1 (macrophage)                                 | 0.537       | 0.08823264  | Insignificant  |
|   | Mm01290062_m1 | Csf2        | colony stimulating factor 2 (granulocyte-macrophage)                     | -           | -           | N.A.           |
|   | Mm00432751_m1 | Csk         | c-src tyrosine kinase                                                    | 1.042       | 0.7218633   | Insignificant  |

|   |               |        |                                                        |       |              |                |
|---|---------------|--------|--------------------------------------------------------|-------|--------------|----------------|
|   | Mm00512037_m1 | Cyp2s1 | cytochrome P450, family 2, subfamily s, polypeptide 1  | 0.039 | -            | N.A.           |
|   | Mm01269874_m1 | Dock1  | dedicator of cytokinesis 1                             | 0.985 | 0.9177907    | Insignificant  |
|   | Mm00473720_m1 | Dock2  | dedicator of cyto-kinesis 2                            | 1.021 | 0.8729215    | Insignificant  |
|   | Mm00519109_m1 | Elmo1  | engulfment and cell motility 1                         | 0.630 | 0.109474644  | Insignificant  |
|   | Mm01204974_m1 | Fas    | Fas cell surface death receptor                        | 0.886 | 0.85421735   | Insignificant  |
|   | Mm02343757_m1 | Fcer1g | Fc receptor, IgE, high affinity I, gamma polypeptide   | 0.777 | 0.22789556   | Insignificant  |
|   | Mm00438874_m1 | Fcgr1  | Fc receptor, IgG, high affinity I                      | 0.257 | 0.034961548  | Down-regulated |
|   | Mm00438875_m1 | Fcgr2b | Fc receptor, IgG, low affinity IIb                     | 0.376 | 0.03289869   | Down-regulated |
|   | Mm00438882_m1 | Fcgr3  | Fc receptor, IgG, low affinity III                     | 0.457 | 0.05749123   | Insignificant  |
|   | Mm00433373_m1 | Fyn    | FYN proto-oncogene, Src family tyrosine kinase         | 0.708 | 0.0152459815 | Flat           |
| * | Mm99999915_g1 | Gapdh  | glyceraldehyde-3-phosphate dehydrogenase               | 1.384 | 0.015334317  | Flat           |
|   | Mm00518428_m1 | Gulp1  | GULP, engulfment adaptor PTB domain containing 1       | -     | -            | N.A.           |
| * | Mm00446953_m1 | Gusb   | glucuronidase, beta                                    | 1.042 | 0.8080083    | Insignificant  |
| * | Mm00660262_g1 | Hmbs   | hydroxymethylbilane synthase                           | 2.248 | 0.1852197    | Insignificant  |
| * | Mm00446968_m1 | Hprt   | hypoxanthine guanine phosphoribosyl transferase        | 1.528 | 0.033382244  | Flat           |
|   | Mm01168134_m1 | Ifng   | interferon gamma                                       | -     | -            | N.A.           |
|   | Mm00516117_m1 | Il1rl1 | interleukin 1 receptor-like 1                          | 0.722 | 0.5056077    | Insignificant  |
| * | Mm01255158_m1 | Ipo8   | importin 8                                             | 1.020 | 0.84822565   | Insignificant  |
|   | Mm01182566_m1 | Iqsec1 | IQ motif and Sec7 domain 1                             | 0.712 | 0.27312392   | Insignificant  |
|   | Mm00434455_m1 | Itgam  | integrin alpha M                                       | 0.234 | 0.0017175004 | Down-regulated |
|   | Mm00434486_m1 | Itgav  | integrin alpha V                                       | 1.161 | 0.43396673   | Insignificant  |
|   | Mm00434513_m1 | Itgb2  | integrin beta 2                                        | 0.926 | 0.6455412    | Insignificant  |
|   | Mm01217488_m1 | Lyn    | Yamaguchi sarcoma viral (v-yes-1) oncogene homolog     | 1.191 | 0.060764432  | Insignificant  |
|   | Mm01301009_m1 | Mapk14 | mitogen-activated protein kinase 14                    | 1.486 | 0.087163374  | Insignificant  |
|   | Mm00440265_m1 | Marco  | macrophage receptor with collagenous structure         | 0.320 | 0.017310344  | Down-regulated |
|   | Mm00487623_m1 | Mbl2   | mannose-binding lectin (protein C) 2                   | -     | -            | N.A.           |
|   | Mm00460328_m1 | Mcoln3 | mucolipin 3                                            | 0.685 | 0.528743     | Insignificant  |
|   | Mm00434920_m1 | Mertk  | c-mer proto-oncogene tyrosine kinase                   | 1.752 | 0.010825158  | Flat           |
|   | Mm00500549_m1 | Mfge8  | milk fat globule-EGF factor 8 protein                  | 0.868 | 0.4174912    | Insignificant  |
|   | Mm03938638_s1 | Mif    | macrophage migration inhibitory factor                 | 0.530 | 0.25248522   | Insignificant  |
|   | Mm00447889_m1 | Msn    | moesin                                                 | 0.871 | 0.2576329    | Insignificant  |
|   | Mm00440338_m1 | Myd88  | myeloid differentiation primary response gene 88       | 1.108 | 0.7475546    | Insignificant  |
|   | Mm00805062_m1 | Nod1   | nucleotide-binding oligomerization domain containing 1 | 0.467 | 0.018206742  | Down-regulated |
|   | Mm01242584_m1 | Pecam1 | platelet/endothelial cell adhesion molecule 1          | 0.906 | 0.82243997   | Insignificant  |
| * | Mm00435617_m1 | Pgk1   | phosphoglycerate kinase 1                              | 1.025 | 0.8835571    | Insignificant  |

|   |               |          |                                                              |       |                |                |
|---|---------------|----------|--------------------------------------------------------------|-------|----------------|----------------|
|   | Mm00659576_m1 | Pik3cb   | phosphatidylinositol 3-kinase, catalytic, beta polypeptide   | 0.685 | 0.010959459    | Flat           |
|   | Mm00476829_m1 | Pip5k1a  | phosphatidylinositol-4-phosphate 5-kinase, type 1 alpha      | 0.967 | 0.8899483      | Insignificant  |
|   | Mm00447040_m1 | Pla2g4a  | phospholipase A2, group IVA (cytosolic, calcium-dependent)   | 0.730 | 0.056154333    | Insignificant  |
|   | Mm00448162_m1 | Pla2g5   | phospholipase A2, group V                                    | 0.805 | 0.69393283     | Insignificant  |
|   | Mm01289339_m1 | Pld1     | phospholipase D1                                             | 0.360 | 0.014450495    | Down-regulated |
|   | Mm00447066_m1 | Pld2     | phospholipase D2                                             | 0.958 | 0.78521127     | Insignificant  |
|   | Mm00440894_m1 | Prkce    | protein kinase C, epsilon                                    | 1.090 | 0.48608992     | Insignificant  |
|   | Mm01343426_m1 | Pros1    | protein S (alpha)                                            | 0.801 | 0.74985003     | Insignificant  |
|   | Mm00477208_m1 | Pten     | phosphatase and tensin homolog                               | 1.450 | 0.20915312     | Insignificant  |
|   | Mm00727887_s1 | Rab5a    | RAB5A, member RAS oncogene family                            | 0.924 | 0.49013537     | Insignificant  |
|   | Mm01183732_g1 | Rab7     | RAB7, member RAS oncogene family                             | 0.904 | 0.35396162     | Insignificant  |
|   | Mm01201653_mH | Rac1     | RAS-related C3 botulinum substrate 1                         | 1.280 | 0.085625395    | Insignificant  |
|   | Mm00485472_m1 | Rac2     | RAS-related C3 botulinum substrate 2                         | 1.338 | 0.03895043     | Flat           |
|   | Mm00450933_m1 | Rala     | v-ral simian leukemia viral oncogene homolog A (ras related) | 1.035 | 0.8661943      | Insignificant  |
|   | Mm00469677_m1 | Ralb     | v-ral simian leukemia viral oncogene homolog B (ras related) | 1.339 | 0.17033182     | Insignificant  |
|   | Mm00522941_m1 | Rapgef3  | Rap guanine nucleotide exchange factor (GEF) 3               | -     | -              | N.A.           |
|   | Mm00834507_g1 | Rhoa     | ras homolog gene family, member A                            | 1.066 | 0.6128333      | Insignificant  |
| * | Mm00782638_s1 | Rplp2    | ribosomal protein, large P2                                  | 1.775 | 0.006717769    | Flat           |
|   | Mm00450234_m1 | Scarb1   | scavenger receptor class B, member 1                         | 1.463 | 0.0030187257   | Flat           |
|   | Mm00435860_m1 | Serpine1 | serine (or cysteine) peptidase inhibitor, clade E, member 1  | 0.763 | 0.364854       | Insignificant  |
|   | Mm00486060_m1 | Sftpd    | surfactant associated protein D                              | 1.061 | 0.8901841      | Insignificant  |
|   | Mm00488332_m1 | Siglec1  | sialic acid binding Ig-like lectin 1, sialoadhesin           | 0.068 | 0.000068767535 | Down-regulated |
|   | Mm02525668_u1 | Sirpb1a  | signal-regulatory protein beta 1A                            | 0.112 | 0.001369061    | Down-regulated |
|   | Mm00454684_m1 | Stab2    | stabilin 2                                                   | -     | -              | N.A.           |
|   | Mm00452814_m1 | Stx18    | syntaxin 18                                                  | 0.943 | 0.5024671      | Insignificant  |
|   | Mm01333032_m1 | Syk      | spleen tyrosine kinase                                       | 1.216 | 0.09423082     | Insignificant  |
| * | Mm00446973_m1 | Tbp      | TATA box binding protein                                     | 1.284 | 0.32984367     | Insignificant  |
| * | Mm00441941_m1 | Tfrc     | transferrin receptor                                         | 1.705 | 0.1138525      | Insignificant  |
|   | Mm00436987_m1 | Tgm2     | transglutaminase 2, C polypeptide                            | 0.556 | 0.4245617      | Insignificant  |
|   | Mm00844508_s1 | Ticam1   | toll-like receptor adaptor molecule 1                        | 1.168 | 0.45567507     | Insignificant  |
|   | Mm01207404_m1 | Tlr3     | toll-like receptor 3                                         | 0.293 | 0.00022732517  | Down-regulated |
|   | Mm00446193_m1 | Tlr9     | toll-like receptor 9                                         | 0.622 | 0.05131324     | Insignificant  |
|   | Mm00443258_m1 | Tnf      | tumor necrosis factor                                        | 0.448 | 0.025960745    | Down-regulated |
|   | Mm00441906_m1 | Tnfsf11  | tumor necrosis factor (ligand) superfamily, member 11        | -     | -              | N.A.           |
|   | Mm00807071_m1 | Vamp7    | vesicle-associated membrane protein 7                        | 1.085 | 0.91970754     | Insignificant  |
|   | Mm01232047_m1 | Vav1     | vav 1 oncogene                                               | 1.100 | 0.44238567     | Insignificant  |

|  |               |       |                                                       |       |            |               |
|--|---------------|-------|-------------------------------------------------------|-------|------------|---------------|
|  | Mm00494167_m1 | Was   | Wiskott-Aldrich syndrome homolog (human)              | 1.065 | 0.76816595 | Insignificant |
|  | Mm00437347_m1 | Wnt5a | wingless-type MMTV integration site family, member 5A | -     | -          | N.A.          |
